# Supplementary material for: Association between Visceral Adipose Tissue Metabolism and Alzheimer’s Disease Pathology
Source: MDPI journal article supplement (doi:10.3390/metabo12030258), 2022-03-17
Supplement: s1 [file s1]

**Supplementary Table S1.** Comparison of cerebral  $\beta$  burden between the low and high VAT metabolism groups

| Variables                                  | Low VAT metabolism group | High VAT metabolism group | <i>p</i> |
|--------------------------------------------|--------------------------|---------------------------|----------|
| Composite SUVR <sub>FBB</sub> <sup>a</sup> | 1.35 (0.16)              | 1.62 (0.33)               | <0.001   |
| Left lateral frontal cortex                | 1.21 (0.17)              | 1.46 (0.33)               | 0.001    |
| Right lateral frontal cortex               | 1.20 (0.16)              | 1.44 (0.31)               | 0.002    |
| Left lateral temporal cortex               | 1.32 (0.16)              | 1.56 (0.29)               | <0.001   |
| Right lateral temporal cortex              | 1.24 (0.15)              | 1.48 (0.29)               | <0.001   |
| Left lateral parietal cortex               | 1.28 (0.19)              | 1.59 (0.40)               | <0.001   |
| Right lateral parietal cortex              | 1.21 (0.19)              | 1.49 (0.36)               | 0.001    |
| Left cingulate                             | 1.48 (0.20)              | 1.79 (0.40)               | <0.001   |
| Right cingulate                            | 1.57 (0.16)              | 1.85 (0.32)               | <0.001   |

<sup>a</sup> Composite regional standardized <sup>18</sup>F-FBB uptake value ratio (SUVR<sub>FBB</sub>) was calculated as the average of the SUVR of the lateral frontal, lateral temporal, and lateral parietal cortices; and cingulate cortex.

**Supplementary Table S2.** Association between visceral adipose tissue  $SUV_{max}$  and cerebral  $A\beta$  burden in subjects with dementia

| Regions                       | Univariable model |       | Multivariable model |                        |       |
|-------------------------------|-------------------|-------|---------------------|------------------------|-------|
|                               | $r$               | $p$   | Adjusted $R^2$      | Standardized $\beta^b$ | $p$   |
| Composite <sup>a</sup>        | 0.533             | 0.011 | 0.248               | 0.533                  | 0.011 |
| Left lateral frontal cortex   | 0.481             | 0.024 | 0.193               | 0.481                  | 0.024 |
| Right lateral frontal cortex  | 0.463             | 0.030 | 0.175               | 0.463                  | 0.030 |
| Left lateral temporal cortex  | 0.506             | 0.016 | 0.219               | 0.506                  | 0.016 |
| Right lateral temporal cortex | 0.446             | 0.038 | 0.195               | 0.446                  | 0.038 |
| Left lateral parietal cortex  | 0.574             | 0.005 | 0.296               | 0.574                  | 0.005 |
| Right lateral parietal cortex | 0.590             | 0.004 | 0.316               | 0.590                  | 0.004 |
| Left cingulate                | 0.509             | 0.015 | 0.336               | 0.529                  | 0.008 |
| Right cingulate               | 0.520             | 0.013 | 0.350               | 0.539                  | 0.006 |

<sup>a</sup> Composite regional standardized  $^{18}F$ -FBB uptake value ratio ( $SUVR_{FBB}$ ) was calculated as the average of the  $SUVR$  of the lateral frontal, lateral temporal, and lateral parietal cortices, as well as the cingulate.

<sup>b</sup> Values represent the standardized linear regression coefficients ( $\beta$ ) of the correlation between the visceral adipose tissue maximum standardized uptake value ( $SUV_{max}$ ) and  $SUVR_{FBB}$ , after adjusting for age, sex and white matter hyperintensity volume.

**Supplementary Table S3.** Association between visceral adipose tissue SUV<sub>mean</sub> and cerebral A $\beta$  burden in subjects with dementia

| Regions                       | Univariable model |          | Multivariable model     |                        |          |
|-------------------------------|-------------------|----------|-------------------------|------------------------|----------|
|                               | <i>r</i>          | <i>p</i> | Adjusted R <sup>2</sup> | Standardized $\beta^b$ | <i>p</i> |
| Composite <sup>a</sup>        | 0.417             | 0.054    | 0.133                   | 0.417                  | 0.054    |
| Left lateral frontal cortex   | 0.389             | 0.074    | 0.109                   | 0.389                  | 0.074    |
| Right lateral frontal cortex  | 0.382             | 0.079    | 0.103                   | 0.382                  | 0.079    |
| Left lateral temporal cortex  | 0.390             | 0.073    | 0.109                   | 0.390                  | 0.073    |
| Right lateral temporal cortex | 0.359             | 0.101    | 0.129                   | 0.359                  | 0.101    |
| Left lateral parietal cortex  | 0.445             | 0.038    | 0.157                   | 0.445                  | 0.038    |
| Right lateral parietal cortex | 0.481             | 0.024    | 0.193                   | 0.481                  | 0.024    |
| Left cingulate                | 0.379             | 0.082    | 0.226                   | 0.426                  | 0.040    |
| Right cingulate               | 0.390             | 0.073    | 0.239                   | 0.437                  | 0.034    |

<sup>a</sup> Composite regional standardized <sup>18</sup>F-FBB uptake value ratio (SUV<sub>FBB</sub>) was calculated as the average of the SUV<sub>R</sub> of the lateral frontal, lateral temporal, and lateral parietal cortices, as well as the cingulate.

<sup>b</sup> Values represent the standardized linear regression coefficients ( $\beta$ ) of the correlation between the visceral adipose tissue mean standardized uptake value (SUV<sub>mean</sub>) and SUV<sub>FBB</sub>, after adjusting for age, sex and white matter hyperintensity volume.

**Supplementary Table S4.** Association between visceral adipose tissue  $SUV_{max}$  and cerebral  $A\beta$  burden in cognitively unimpaired subjects

| Regions                       | Univariable model |          | Multivariable model |                        |          |
|-------------------------------|-------------------|----------|---------------------|------------------------|----------|
|                               | <i>r</i>          | <i>p</i> | Adjusted $R^2$      | Standardized $\beta^b$ | <i>p</i> |
| Composite <sup>a</sup>        | 0.213             | 0.396    | 0.393               | 0.319                  | 0.117    |
| Left lateral frontal cortex   | 0.172             | 0.494    | 0.172               | 0.138                  | 0.564    |
| Right lateral frontal cortex  | 0.228             | 0.362    | 0.433               | 0.338                  | 0.088    |
| Left lateral temporal cortex  | 0.197             | 0.434    | 0.341               | 0.298                  | 0.157    |
| Right lateral temporal cortex | 0.127             | 0.616    | 0.361               | 0.223                  | 0.276    |
| Left lateral parietal cortex  | 0.182             | 0.471    | 0.158               | 0.259                  | 0.269    |
| Right lateral parietal cortex | 0.068             | 0.789    | 0.119               | 0.096                  | 0.692    |
| Left cingulate                | 0.262             | 0.293    | 0.380               | 0.364                  | 0.080    |
| Right cingulate               | 0.263             | 0.292    | 0.350               | 0.361                  | 0.089    |

<sup>a</sup> Composite regional standardized  $^{18}F$ -FBB uptake value ratio ( $SUVR_{FBB}$ ) was calculated as the average of the  $SUVR$  of the lateral frontal, lateral temporal, and lateral parietal cortices, as well as the cingulate.

<sup>b</sup> Values represent the standardized linear regression coefficients ( $\beta$ ) of the correlation between the visceral adipose tissue maximum standardized uptake value ( $SUV_{max}$ ) and  $SUVR_{FBB}$ , after adjusting for age, sex and white matter hyperintensity volume.

**Supplementary Table S5.** Association between visceral adipose tissue  $SUV_{mean}$  and cerebral  $A\beta$  burden in cognitively unimpaired subjects

| Regions                       | Univariable model |       | Multivariable model |                        |       |
|-------------------------------|-------------------|-------|---------------------|------------------------|-------|
|                               | $r$               | $p$   | Adjusted $R^2$      | Standardized $\beta^b$ | $p$   |
| Composite <sup>a</sup>        | 0.119             | 0.638 | 0.345               | 0.243                  | 0.242 |
| Left lateral frontal cortex   | 0.045             | 0.858 | 0.151               | 0.037                  | 0.878 |
| Right lateral frontal cortex  | 0.140             | 0.580 | 0.386               | 0.269                  | 0.185 |
| Left lateral temporal cortex  | 0.205             | 0.414 | 0.360               | 0.327                  | 0.118 |
| Right lateral temporal cortex | 0.101             | 0.691 | 0.349               | 0.207                  | 0.318 |
| Left lateral parietal cortex  | 0.105             | 0.677 | 0.125               | 0.196                  | 0.409 |
| Right lateral parietal cortex | -0.071            | 0.779 | 0.051               | -0.005                 | 0.983 |
| Left cingulate                | 0.162             | 0.520 | 0.321               | 0.281                  | 0.187 |
| Right cingulate               | 0.222             | 0.376 | 0.332               | 0.339                  | 0.114 |

<sup>a</sup> Composite regional standardized  $^{18}F$ -FBB uptake value ratio ( $SUVR_{FBB}$ ) was calculated as the average of the  $SUVR$  of the lateral frontal, lateral temporal, and lateral parietal cortices, as well as the cingulate.

<sup>b</sup> Values represent the standardized linear regression coefficients ( $\beta$ ) of the correlation between the visceral adipose tissue mean standardized uptake value ( $SUV_{mean}$ ) and  $SUVR_{FBB}$ , after adjusting for age, sex and white matter hyperintensity volume.

**Supplementary Table S6.** Association between visceral adipose tissue  $SUV_{max}$  and cerebral  $A\beta$  burden in subjects with mild cognitive impairment

| Regions                       | Univariable model |          | Multivariable model |                        |          |
|-------------------------------|-------------------|----------|---------------------|------------------------|----------|
|                               | <i>r</i>          | <i>p</i> | Adjusted $R^2$      | Standardized $\beta^b$ | <i>p</i> |
| Composite <sup>a</sup>        | 0.145             | 0.620    | -0.128              | 0.127                  | 0.677    |
| Left lateral frontal cortex   | 0.006             | 0.985    | -0.303              | 0.029                  | 0.932    |
| Right lateral frontal cortex  | 0.056             | 0.848    | -0.346              | 0.026                  | 0.941    |
| Left lateral temporal cortex  | 0.080             | 0.785    | -0.314              | 0.056                  | 0.871    |
| Right lateral temporal cortex | 0.065             | 0.826    | -0.331              | -0.003                 | 0.994    |
| Left lateral parietal cortex  | 0.054             | 0.853    | -0.161              | 0.077                  | 0.805    |
| Right lateral parietal cortex | 0.095             | 0.747    | -0.214              | 0.074                  | 0.818    |
| Left cingulate                | 0.180             | 0.538    | -0.093              | 0.156                  | 0.604    |
| Right cingulate               | 0.178             | 0.543    | -0.086              | 0.219                  | 0.472    |

<sup>a</sup> Composite regional standardized  $^{18}F$ -FBB uptake value ratio ( $SUVR_{FBB}$ ) was calculated as the average of the  $SUVR$  of the lateral frontal, lateral temporal, and lateral parietal cortices, as well as the cingulate.

<sup>b</sup> Values represent the standardized linear regression coefficients ( $\beta$ ) of the correlation between the visceral adipose tissue maximum standardized uptake value ( $SUV_{max}$ ) and  $SUVR_{FBB}$ , after adjusting for age, sex and white matter hyperintensity volume.

**Supplementary Table S7.** Association between visceral adipose tissue SUV<sub>mean</sub> and cerebral A $\beta$  burden in subjects with mild cognitive impairment

| Regions                       | Univariable model |          | Multivariable model     |                        |          |
|-------------------------------|-------------------|----------|-------------------------|------------------------|----------|
|                               | <i>r</i>          | <i>p</i> | Adjusted R <sup>2</sup> | Standardized $\beta^b$ | <i>p</i> |
| Composite <sup>a</sup>        | 0.131             | 0.656    | -0.128                  | 0.126                  | 0.677    |
| Left lateral frontal cortex   | 0.033             | 0.910    | -0.297                  | 0.076                  | 0.824    |
| Right lateral frontal cortex  | 0.038             | 0.897    | -0.346                  | 0.014                  | 0.968    |
| Left lateral temporal cortex  | 0.066             | 0.823    | -0.307                  | 0.093                  | 0.785    |
| Right lateral temporal cortex | 0.017             | 0.953    | -0.331                  | -0.012                 | 0.972    |
| Left lateral parietal cortex  | 0.084             | 0.775    | -0.151                  | 0.124                  | 0.697    |
| Right lateral parietal cortex | 0.108             | 0.712    | -0.217                  | 0.060                  | 0.855    |
| Left cingulate                | 0.174             | 0.552    | -0.088                  | 0.168                  | 0.574    |
| Right cingulate               | 0.156             | 0.594    | -0.085                  | 0.225                  | 0.471    |

<sup>a</sup> Composite regional standardized <sup>18</sup>F-FBB uptake value ratio (SUV<sub>FBB</sub>) was calculated as the average of the SUV<sub>R</sub> of the lateral frontal, lateral temporal, and lateral parietal cortices, as well as the cingulate.

<sup>b</sup> Values represent the standardized linear regression coefficients ( $\beta$ ) of the correlation between the visceral adipose tissue mean standardized uptake value (SUV<sub>mean</sub>) and SUV<sub>FBB</sub>, after adjusting for age, sex and white matter hyperintensity volume.
